# Supplementary material
Source: PubMed Central journal article supplement (PMC5283870)
Supplement: ry160220suppa1.pdf [file ry160220suppa1.pdf]

**Table E1. MR Imaging Sequence Parameters**

| Sequence                                                                | Pulse Sequence | Repetition time/echo time (msec) | Flip Angle (degrees) | Field of View (mm) | Section Thickness (mm) | Matrix          | No. of Signals Acquired | Other Parameters                                    |
|-------------------------------------------------------------------------|----------------|----------------------------------|----------------------|--------------------|------------------------|-----------------|-------------------------|-----------------------------------------------------|
| Axial three-dimensional T1-weighted fast spoiled gradient-recalled echo | ...            | 5.0/2.4–2.5                      | ...                  | 240                | 4.2                    | 192 × 128       | 2                       | No. of sections, 64                                 |
| Axial T2 weighted                                                       | Cube           | 2400/135.9–142.9                 | variable             | 180                | 2.0                    | 256 × 256       | 2                       | Echo train length, 100; no. of sections, 64         |
| Axial T1-weighted Dixon                                                 | IDEAL          | 4.0/1.7                          | ...                  | 500                | 3.0                    | 256 × 256       | ...                     | ...                                                 |
| Axial diffusion weighted                                                | rFOV EPI       | 4700/69.7–87.7                   | ...                  | 200 × 100          | 3.0                    | 128 × 64        | 6                       | $b = 0$ , 600 sec/mm <sup>2</sup> ; six directions  |
| Axial diffusion weighted                                                | rFOV EPI       | 4700/69.7–87.7                   | ...                  | 260 × 130          | 3.0                    | 128 × 64        | 7                       | $b = 0$ , 1350 sec/mm <sup>2</sup> ; six directions |
| Unenhanced axial T1-weighted                                            | DISCO          | 3.8/1.2                          | 5                    | 260                | 3.0                    | 192 × 128       | 1                       | 3.7; no. of images, 64                              |
| Gadolinium-enhanced T1-weighted with dynamic contrast enhancement       | DISCO          | 3.8/1.2                          | 10                   | 260                | 3.0                    | 192 × 128       | 1                       | 3.7; no. of images, 64                              |
| Hydrogen 1 MR spectroscopy                                              | ...            | 2000                             | ...                  | 85 × 27–65 × 27    | 3.0                    | 16 × 10–12 × 10 | 1                       | ...                                                 |

Note.—Cube = three-dimensional fast spin-echo with variable flip angle, DISCO = differential subsampling with cartesian ordering, EPI = echo-planar imaging, IDEAL = iterative decomposition of water and fat with echo asymmetry and least-squares estimation, rFOV = rectangular field of view.

**Table E2. Correlations between PET/MR Imaging Parameters and Clinical-Pathologic Characteristics**

| Clinical-Pathologic Characteristics   | Average $K_1$ (min <sup>-1</sup> ) | Maximum $K_1$ (min <sup>-1</sup> ) | SUV <sub>avg</sub> | SUV <sub>max</sub> | PI-RADS Version 2 Score |
|---------------------------------------|------------------------------------|------------------------------------|--------------------|--------------------|-------------------------|
| Age (y)                               | 0.04                               | -0.14                              | -0.22              | 0.22               | -0.62*                  |
| Serum PSA (ng/mL) <sup>†</sup>        | 0.36                               | 0.15                               | 0.22               | 0.71*              | 0.35                    |
| GS at biopsy                          | -0.09                              | 0.02                               | -0.12              | -0.12              | -0.08                   |
| GS after surgery                      | -0.13                              | 0.26                               | -0.13              | 0.10               | 0.45                    |
| Pathologic tumor volume               | -0.09                              | 0.19                               | 0.13               | 0.29               | 0.81 <sup>‡</sup>       |
| Percentage of tumor cells with GS > 3 | -0.46                              | -0.22                              | -0.44              | -0.12              | 0.59*                   |
| Overall pathologic stage              | -0.03                              | 0.23                               | 0.02               | 0.59*              | 0.19                    |
| Presurgical CAPRA score               | -0.27                              | 0.14                               | -0.09              | 0.69*              | 0.36                    |
| Postsurgical CAPRA score              | -0.02                              | 0.40                               | 0.03               | 0.72 <sup>‡</sup>  | 0.58*                   |

Note.—Data were acquired by using the Spearman rank correlation coefficient,  $\rho$ .

\*  $P < .05$ .

† To convert to Systéme International units (micrograms per liter), multiply by 1.

‡  $P < .01$ .
